# Supplementary material for: Apply Remote Sensing to Monitoring Dynamics of Built Environmental in The Core Area and The Border of Sokok City
Source: Preprints.org preprint supplement (doi:10.20944/preprints202012.0785.v1), 2020-12-31
Supplement: Supplementary file 3 [file supplementary]

DATA

| No | Data | Sources |
| --- | --- | --- |
| 1 | Landsat TM5 | http://landsat.usgs.gov |
| 2 | Landsat OLI 8 | http://landsat.usgs.gov |
| 3 | Administration Map | http://tanahairindonesia.go.id |
| No | **Table**. 2 Tools  Tools | |
| 1 | ENVI |  |
| 2 | Q-GIS |  |

| 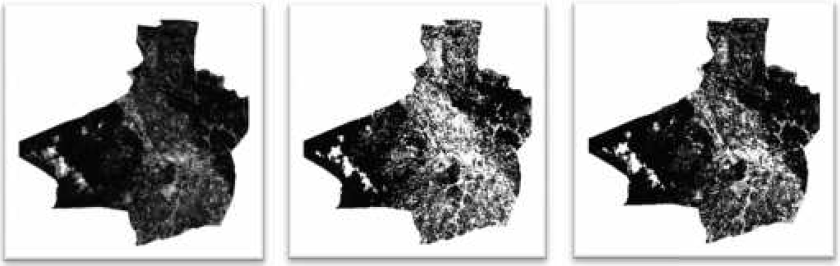 | | |
| --- | --- | --- |
| NDVI 2004 | NDBI 2004 | BUIL-UP 2004 |
| 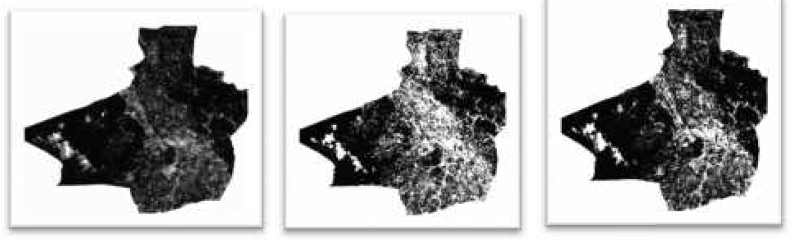 | | |
| NDVI 2010 | NDBI 2010 | BUIL-UP 2010 |
| 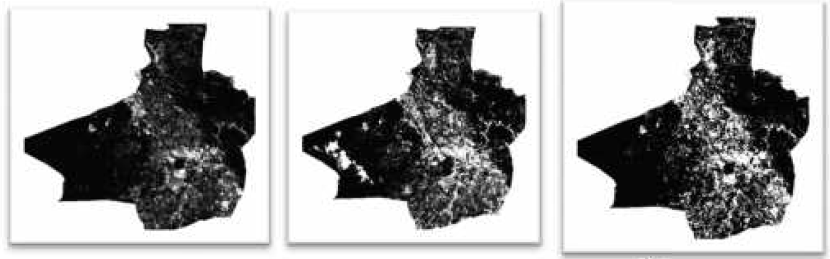 | | |
| NDVI 2018 | NDBI 2018 | BUIL-UP 2020 |

| 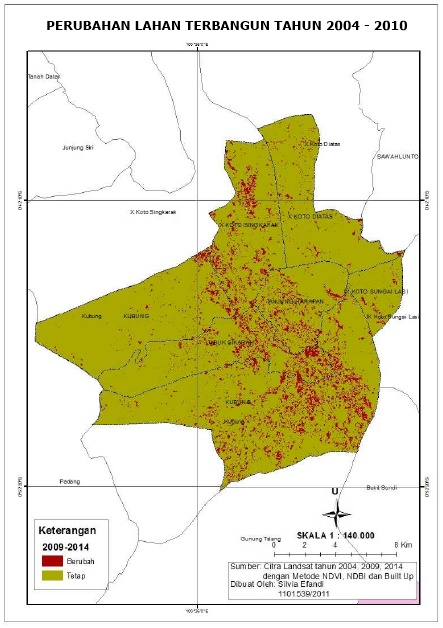 | 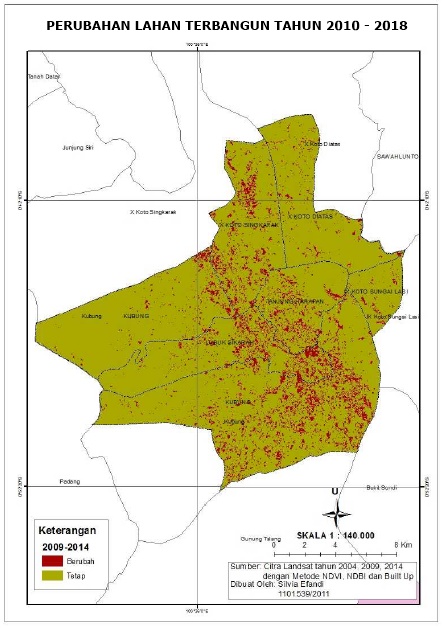 |
| --- | --- |

Figure. Result of Comparison Built Environment Changes in 2004 to 2010 and 2020 to 2018
